# Supplementary material for: Effect of adhesion and chemokine presentation on T-lymphocyte haptokinesis
Source: Royal Society of Chemistry journal article supplement (doi:10.1039/c4ib00094c), 2014-01-01
Supplement: c4ib00094c1.pdf [file c4ib00094c1.pdf]

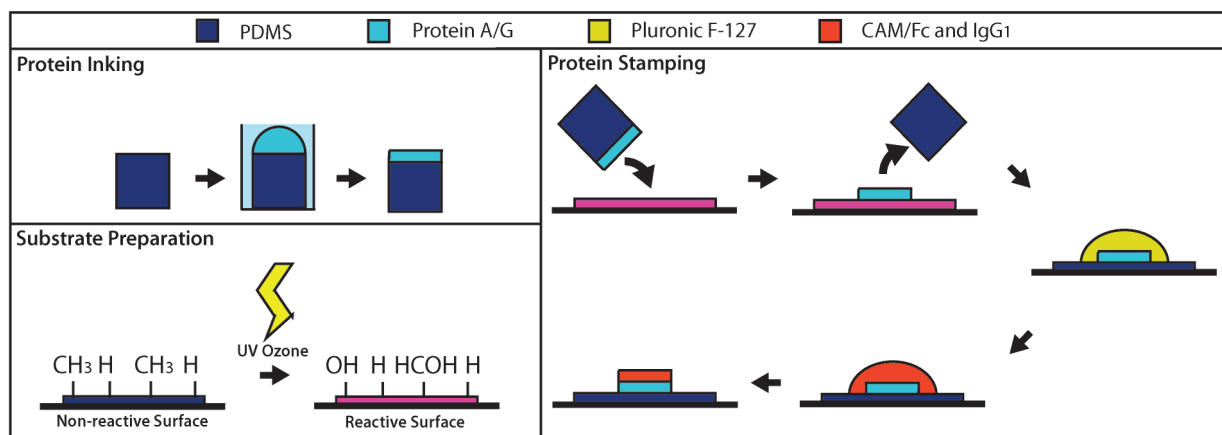

Fig. S1. Microcontact printing of PDMS substrates. Illustration for microcontact printing of protein A/G followed by subsequent binding of either ICAM-1/Fc or VCAM-1/Fc with IgG<sub>1</sub>.

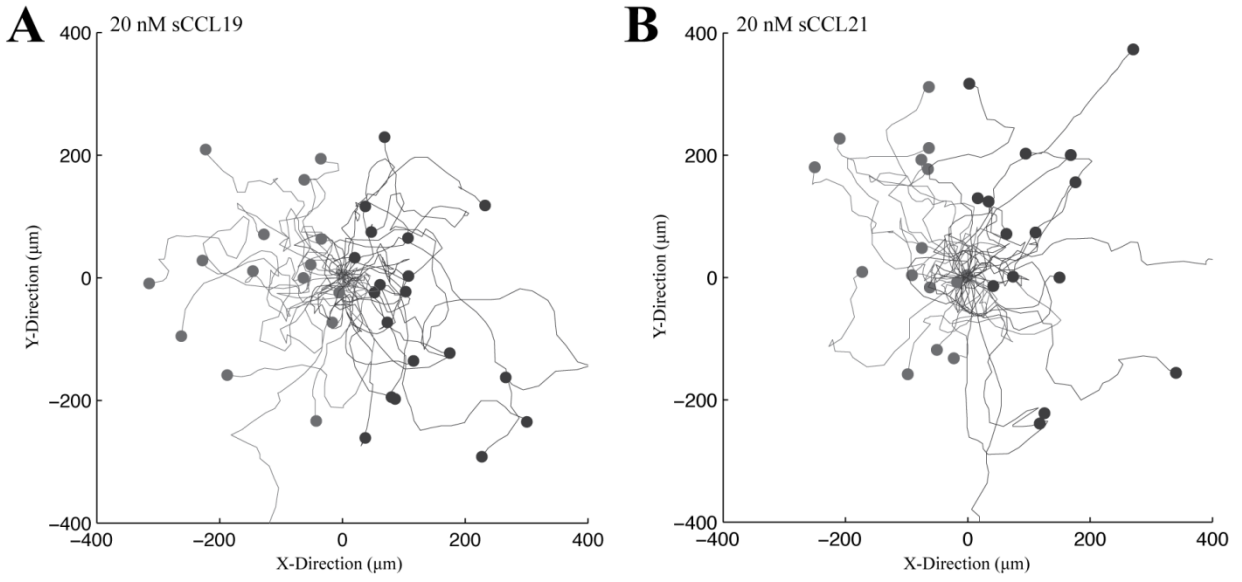

Fig. S2 CCL19 and CCL21 Chemokinesis. Single cell migration tracks showing random motility at (A) 20 nM CCL19 and (B) 20 nM CCL21 with no preferred direction in migration

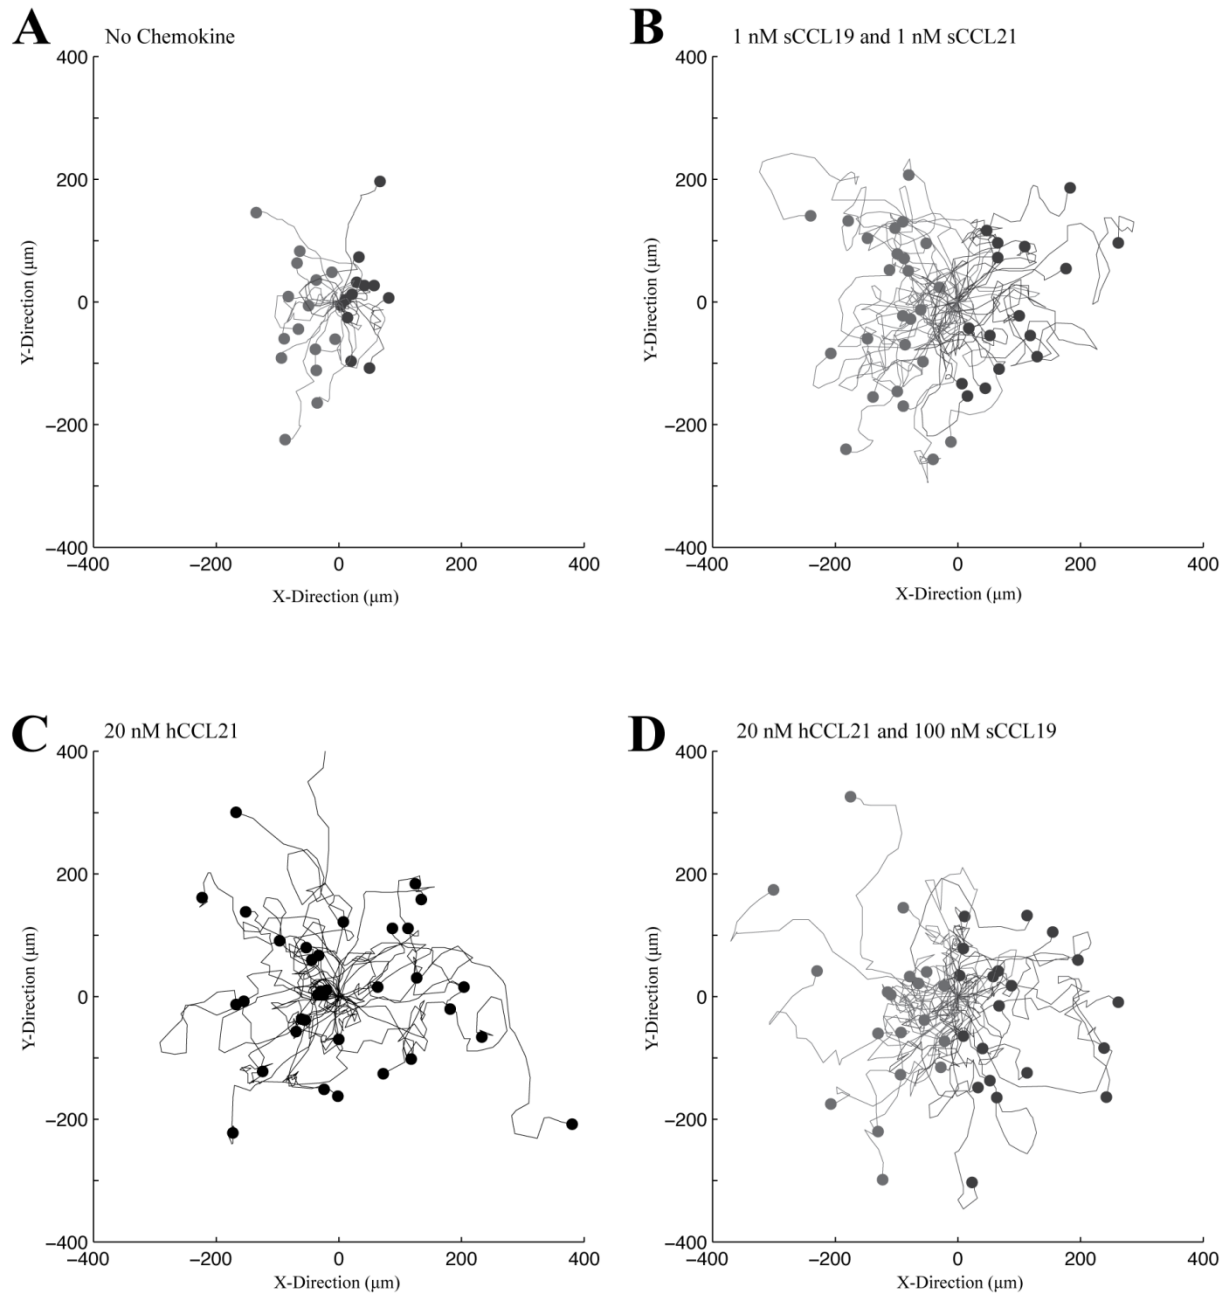

Fig. S3 Single cell tracks for combinatorial chemokinesis. Single cell migration tracks showing random motility on (A) 0.05  $\mu\text{g}/\text{ml}$  of ICAM-1 alone (B) 1nM soluble CCL19 and 1 nM soluble CCL21 (C) 20 nM of printed CCL21 and (D) 20 nM of printed CCL21 with 100 nM soluble CCL19 with no preferred direction in migration
